# Supplementary material
Source: Springer Nature journal article supplement (https://www.springermedizin.de/resource/supplementary/12958_2009_621_MOESM3_ESM.pdf/9568112)

# CAT

a

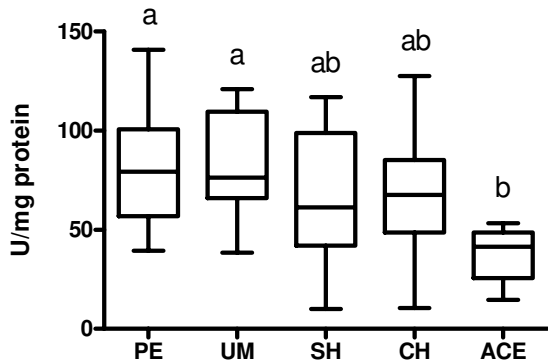

b

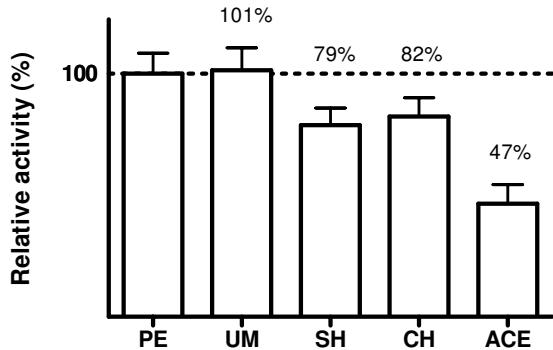

Supplement: MOESM3 [file 9568112]
